# Supplementary material for: A nanoscale inorganic coating strategy for stabilizing hydrogel neural probes in vivo
Source: Royal Society of Chemistry journal article supplement (doi:10.1039/d3tb00710c), 2023-01-01
Supplement: d3tb00710c1.pdf [file d3tb00710c1.pdf]

1      **Nanoscale Inorganic Coating Strategy for Stabilizing Hydrogel Neural Probes in vivo**

2 Sizhe Huang<sup>1</sup>, Sabrina Urbina Villafranca<sup>1</sup>, Iyanah Mehta<sup>1</sup>, Omri Yosfan<sup>1</sup>, Eunji Hong<sup>1</sup>, Anyang  
3 Wang<sup>2</sup>, Nianqiang Wu<sup>2</sup>, Qianbin Wang<sup>1, \*</sup>, Siyuan Rao<sup>1, 3, 4, \*</sup>

4 1. Department of Biomedical Engineering, University of Massachusetts, Amherst, MA 01003,  
5 United States

6 2. Department of Chemical Engineering, University of Massachusetts, Amherst, MA 01003,  
7 United States

8 3. Institute for Applied Life Sciences, University of Massachusetts, Amherst, MA 01003, United  
9 States

10 4. Neuroscience and Behavior Graduate Program, University of Massachusetts, Amherst, MA  
11 01003, United States

12 Corresponding authors: Qianbin Wang (qianbinwang@umass.edu), Siyuan Rao  
13 (syrao@umass.edu)

14

## 1 Supplementary figures

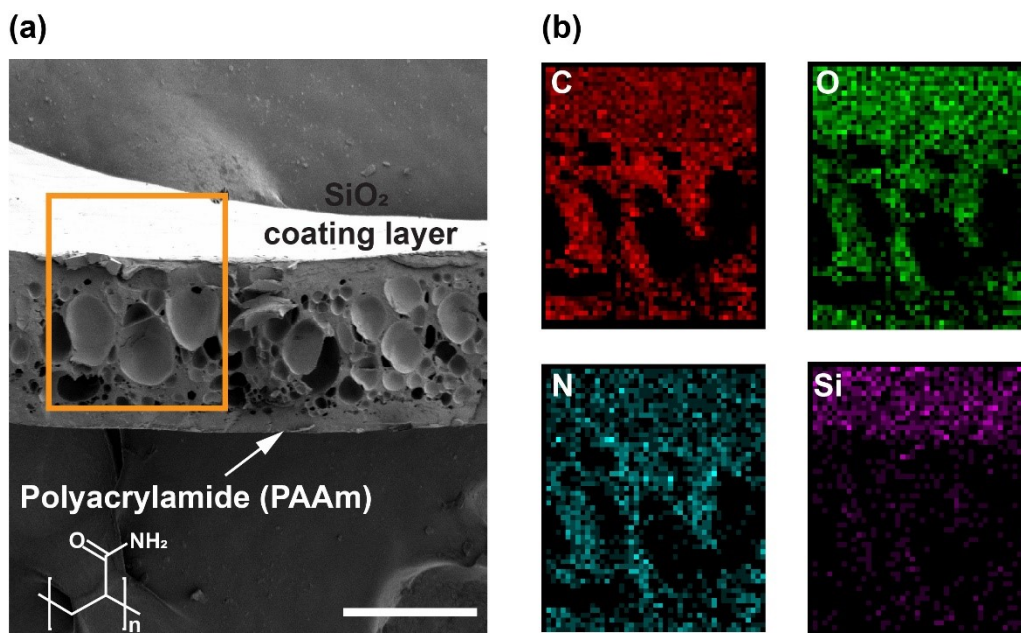

2

3 **Supplementary Fig. 1** (a) Scanning electron microscopy (SEM) image at the cross-section of a  
4 chemically cross-linked Polyacrylamide (PAAm, 50 wt. %) hydrogel thin film. A SiO<sub>2</sub> layer was  
5 deposited on top of the PAAm thin film through the atomic layer deposition (ALD) process. Inset:  
6 chemical formula of PAAm. Scale: 200 μm; (b) energy-dispersive X-ray spectroscopy (EDX)  
7 element mapping in the selected area (yellow box).

8

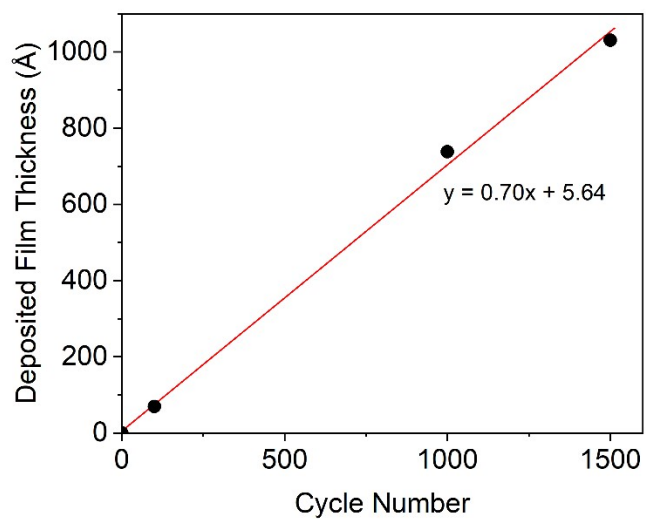

1

2 **Supplementary Fig. 2** Linear relationship between SiO<sub>2</sub> coating (deposited on Si substrates)  
3 thickness and ALD cycle numbers ( $R^2=0.9978$ , 1 cycle=0.8 min).

4

5

6

7

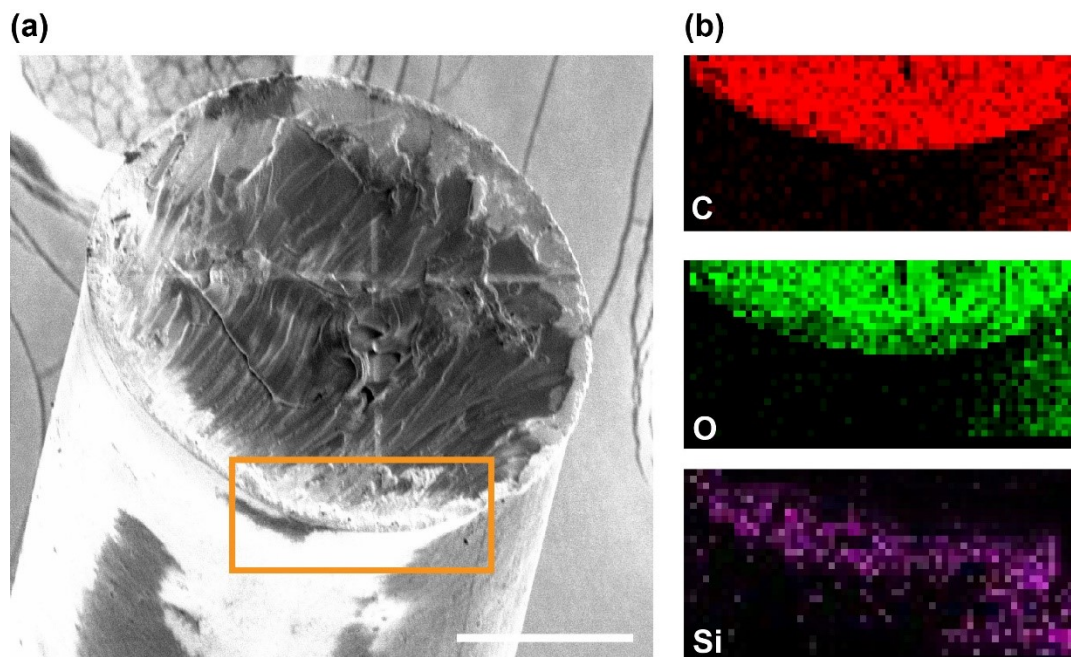

1

2 **Supplementary Fig. 3** (a) Scanning electron microscopy (SEM) image at the cross-section of a  
3  $\text{SiO}_2$ -coated PVA hydrogel fiber after incubating in hydrochloric acid (HCl) solution (pH=4) at 45  
4  $^\circ\text{C}$  for one week; (b) energy-dispersive X-ray spectroscopy (EDX) element distribution in the  
5 selected area (yellow box).

6
